# Supplementary material for: Efficient detection of Fe(iii) and chromate ions in water using two robust lanthanide metal–organic frameworks
Source: Royal Society of Chemistry journal article supplement (doi:10.1039/d0ce01802c), 2021-01-01
Supplement: d0ce01802c1.pdf [file d0ce01802c1.pdf]

## Electronic Supplementary Information (ESI)

### Efficient Detection of Fe(III) and Chromate Ions in Water by Two

### Robust Lanthanide Metal-Organic Frameworks

Jian-Peng Dong, Bo Li,\* Yu-Jie Jin and Li-Ya Wang\*

College of Chemistry and Pharmaceutical Engineering, Nanyang Normal University, Nanyang 473061, People's Republic of China.

#### Corresponding authors:

\*(B. Li) E-mail: libony0107@nynu.edu.cn

\*(L. Y. Wang) E-mail: wly@nynu.edu.cn

### Experimental Section

#### Materials and Instrumentations

All of the materials were commercially available and used without further purification. All the solvents used were of analytical grade. Powder X-ray diffraction (PXRD) data of the samples were collected on a D/MAX-3D diffractometer with Cu K $\alpha$  radiation ( $\lambda=1.5418 \text{ \AA}$ ) over the  $2\theta$  range of  $5^\circ$ – $50^\circ$  at the scan rate of  $5^\circ \text{ min}^{-1}$  at room temperature. Simulation of the PXRD spectra was carried out with the single-crystal data and diffraction crystal module of the Mercury program available free of charge via <http://www.ccdc.cam.ac.uk/mercury/>. Thermogravimetry analyses (TGA) were performed on a TA Q50 system under a N<sub>2</sub> atmosphere (flow rate =  $60 \text{ mL min}^{-1}$ ) in the temperature range  $25$ – $700 \text{ }^\circ\text{C}$  at a heating rate of  $10 \text{ }^\circ\text{C min}^{-1}$ . Elemental analyses of C, H and N for all samples were collected on a Perkin-Elmer 240 analyzer. Fourier-transform infrared spectra (FT-IR) were recorded on a Shimadzu IR Tracer-100 by using KBr pellets ( $4000$ – $400 \text{ cm}^{-1}$ ). UV-vis diffuse reflectance spectra were recorded with a Shimadzu UV-2600 UV-vis spectrophotometer. Luminescence spectra and lifetime decays were collected on an Edinburgh FLS980 fluorescence spectrophotometer. The quantum yields (QYs) of **1-Eu** and **1-Tb** were measured using a BaSO<sub>4</sub>-coated integrating sphere and calculated through an absolute method.<sup>1</sup> All photographs were taken with a Canon EOS 80D camera.

#### X-Ray crystallography

Single-crystal X-ray diffraction (SCXRD) measurements were performed on a Rigaku XtaLAB Pro diffractometer with Cu-K $\alpha$  radiation ( $\lambda = 1.54178 \text{ \AA}$ ) at  $200/293 \text{ K}$ . The SADABS program was used for absorption correction.<sup>2</sup> All the structures were solved by direct methods and refined by the full-matrix least-squares method on  $F^2$  with SHELXS and SHELXL programs.<sup>3</sup> The hydrogen atoms on ligands were placed in calculated positions and refined using the riding model. The hydrogens attached to water molecules were located from the difference Fourier maps and refined isotropically. Because guest solvent molecules H<sub>2</sub>O in the frameworks were highly disordered, the diffused contributions from them were removed by the SQUEEZE routine in PLATON. The final formula of complexes were determined by means

of single-crystal structure, TGA and elemental analysis. Refinement parameters and crystallographic data are listed in Table S1-S3 (Supporting Information).

### Syntheses of $\{[\text{Ln}(\text{L})(\text{H}_2\text{O})] \cdot 7\text{H}_2\text{O}\}_n$ (Ln = Eu, Tb)

The mixture solution of  $\text{H}_3\text{L}$  (0.05 mmol),  $\text{Eu}(\text{NO}_3)_3 \cdot 6\text{H}_2\text{O}$  (0.1 mmol), DMF (3 mL),  $\text{H}_2\text{O}$  (2 mL) and  $\text{HNO}_3$  (0.1 mL) was stirred for 30 min, then transferred to a Teflon-lined stainless steel vessel then heated at 150 °C for 72 h. After cooled to room temperature at a rate of 5 °C  $\text{min}^{-1}$ , the resulting colorless crystals were harvested by filtration, washed with distilled water, and then dried in air to furnish **1-Eu**. Other complexes were synthesized similarly to **1-Eu**, except  $\text{Tb}(\text{NO}_3)_3 \cdot 6\text{H}_2\text{O}$  in place of Eu(III) nitrate.

$\{[\text{Eu}(\text{L})(\text{H}_2\text{O})] \cdot 7\text{H}_2\text{O}\}_n$  (**1-Eu**). Yield: 64.5% (based on  $\text{H}_3\text{L}$ ).  $\text{C}_{14}\text{H}_{22}\text{EuNO}_{14}$  (Mr = 580.17). Elemental analysis calcd: C 28.96, H 3.79, N 2.41 %. Found: C 28.98, H 3.85, N 2.48 %.

$\{[\text{Tb}(\text{L})(\text{H}_2\text{O})] \cdot 7\text{H}_2\text{O}\}_n$  (**1-Tb**). Yield: 62.6% (based on  $\text{H}_3\text{L}$ ).  $\text{C}_{14}\text{H}_{22}\text{TbNO}_{14}$  (Mr = 587.13). Elemental analysis calcd: C 28.61, H 3.75, N 2.38 %. Found: C 28.87, H 3.81, N 2.42 %.

### Luminescence Sensing Experiments

In particular, 2.0 mg of powder sample was added into 3.0 mL of deionized water of  $\text{M}(\text{NO}_3)_x$  ( $\text{M} = \text{Ca}^{2+}$ ,  $\text{Ag}^+$ ,  $\text{Mg}^{2+}$ ,  $\text{K}^+$ ,  $\text{Na}^+$ ,  $\text{Mn}^{2+}$ ,  $\text{Cr}^{3+}$ ,  $\text{Pb}^{2+}$ ,  $\text{Cd}^{2+}$ ,  $\text{Fe}^{2+}$ ,  $\text{Zn}^{2+}$ ,  $\text{Al}^{3+}$ ,  $\text{Bi}^{3+}$ ,  $\text{Co}^{2+}$ ,  $\text{Ni}^{2+}$ ,  $\text{Cu}^{2+}$ , and  $\text{Fe}^{3+}$ ) and  $\text{KX}$  ( $\text{X} = \text{X} = \text{Cl}^-$ ,  $\text{Br}^-$ ,  $\text{I}^-$ ,  $\text{IO}_3^-$ ,  $\text{SCN}^-$ ,  $\text{PO}_4^{3-}$ ,  $\text{NO}_3^-$ ,  $\text{CO}_3^{2-}$ ,  $\text{SO}_4^{2-}$ ,  $\text{H}_2\text{PO}_4^-$ ,  $\text{MnO}_4^-$ ,  $\text{OH}^-$ ,  $\text{Ac}^-$ ,  $\text{CrO}_4^{2-}$ ,  $\text{Cr}_2\text{O}_7^{2-}$ ) at the same concentration (1 mM). Then, the mixtures were ultrasonicated for 10 min to form a suspension, followed by recording of the luminescent spectra under the same conditions.

**Table S1.** Crystal data and structural refinement parameters for **1-Eu** and **1-Tb**.

|                                      | <b>1-Eu</b>                                  | <b>1-Tb</b>                                  |
|--------------------------------------|----------------------------------------------|----------------------------------------------|
| CCDC number                          | 2045548                                      | 2045549                                      |
| Formula                              | $\text{C}_{14}\text{H}_{22}\text{EuNO}_{14}$ | $\text{C}_{14}\text{H}_{22}\text{TbNO}_{14}$ |
| Formula weight                       | 580.17                                       | 587.13                                       |
| $T / \text{K}$                       | 293(2)                                       | 293(2)                                       |
| Space group                          | $I4_1/a$                                     | $I4_1/a$                                     |
| Crystal system                       | Tetragonal                                   | Tetragonal                                   |
| $a / \text{Å}$                       | 25.3668(2)                                   | 25.3649(10)                                  |
| $b / \text{Å}$                       | 25.3668(2)                                   | 25.3649(10)                                  |
| $c / \text{Å}$                       | 15.1922(2)                                   | 15.2716(10)                                  |
| $\alpha / \text{deg}$                | 90                                           | 90                                           |
| $\beta / \text{deg}$                 | 90                                           | 90                                           |
| $\gamma / \text{deg}$                | 90                                           | 90                                           |
| $V / \text{Å}^3$                     | 9775.8(2)                                    | 9825.41(10)                                  |
| $Z$                                  | 16                                           | 16                                           |
| $D_{\text{calc}} (\text{g cm}^{-3})$ | 1.234                                        | 1.247                                        |
| Reflections collected                | 12876                                        | 13665                                        |
| Independent reflections              | 4805                                         | 4819                                         |
| $R(\text{int})$                      | 0.0340                                       | 0.0272                                       |
| $F(000)$                             | 3488                                         | 3520                                         |

|                                                                                                                |                |                |
|----------------------------------------------------------------------------------------------------------------|----------------|----------------|
| GOF on $F^2$                                                                                                   | 1.086          | 1.105          |
| $R_1^a, wR_2^b [I > 2\sigma(I)]$                                                                               | 0.0473, 0.1809 | 0.0607, 0.2499 |
| $R_1^a, wR_2^b$ (all data)                                                                                     | 0.0503, 0.1843 | 0.0642, 0.2579 |
| $^a R_1 = \sum   F_o  -  F_c   / \sum  F_o $ . $^b wR_2 = [\sum w(F_o^2 - F_c^2)^2 / \sum w(F_o^2)^2]^{1/2}$ . |                |                |

**Table S2.** Selected bond lengths (Å) and angles (°) for **1-Eu**.

|                                                                                                                                                                       |            |               |            |               |            |
|-----------------------------------------------------------------------------------------------------------------------------------------------------------------------|------------|---------------|------------|---------------|------------|
| Eu1-O1                                                                                                                                                                | 2.426(4)   | Eu1-O3#2      | 2.355(3)   | Eu1-O4#1      | 2.308(4)   |
| Eu1-O2                                                                                                                                                                | 2.488(4)   | Eu1-O6#3      | 2.464(3)   | Eu1-O7        | 2.433(4)   |
| Eu1-O6#4                                                                                                                                                              | 2.617(3)   | Eu1-N1#3      | 2.581(4)   | Eu1-O5#4      | 2.575(4)   |
| O3#2-Eu1-O1                                                                                                                                                           | 82.76(13)  | O4#1-Eu1-O1   | 94.08(14)  | O4#1-Eu1-O3#2 | 144.24(14) |
| O1-Eu1-O7                                                                                                                                                             | 132.96(13) | O3#2-Eu1-O7   | 79.13(14)  | O4#1-Eu1-O7   | 77.28(14)  |
| O1-Eu1-O6#3                                                                                                                                                           | 75.48(12)  | O3#2-Eu1-O6#3 | 138.81(12) | O4#1-Eu1-O6#3 | 72.82(13)  |
| O3#2-Eu1-O2                                                                                                                                                           | 76.85(13)  | O4#1-Eu1-O2   | 73.03(15)  | O7-Eu1-O6#3   | 140.19(14) |
| O6#3-Eu1-O2                                                                                                                                                           | 114.20(12) | O7-Eu1-O2     | 80.43(13)  | O1-Eu1-O2     | 53.17(12)  |
| O1-Eu1-O5#4                                                                                                                                                           | 142.47(13) | O3#2-Eu1-O5#4 | 125.17(12) | O4#1-Eu1-O5#4 | 76.96(15)  |
| O2-Eu1-O5#4                                                                                                                                                           | 147.53(15) | O6#3-Eu1-O5#4 | 67.03(13)  | O7-Eu1-O5#4   | 81.17(15)  |
| O1-Eu1-N1#3                                                                                                                                                           | 78.58(13)  | O3#2-Eu1-N1#3 | 78.53(13)  | O4#1-Eu1-N1#3 | 135.95(13) |
| O2-Eu1-N1#3                                                                                                                                                           | 127.74(13) | O6#3-Eu1-N1#3 | 63.25(12)  | O7-Eu1-N1#3   | 137.72(13) |
| O3#2-Eu1-O6#4                                                                                                                                                         | 75.46(11)  | O4#1-Eu1-O6#4 | 120.32(13) | O5#4-Eu1-N1#3 | 83.07(15)  |
| O6#3-Eu1-O6#4                                                                                                                                                         | 102.75(10) | O7-Eu1-O6#4   | 70.73(12)  | O1-Eu1-O6#4   | 143.86(12) |
| N1#3-Eu1-O6#4                                                                                                                                                         | 69.14(12)  | O5#4-Eu1-O6#4 | 49.74(12)  | O2-Eu1-O6#4   | 143.05(12) |
| Symmetry transformations used to generate equivalent atoms: #1 $y-1/4, -x+5/4, -z+1/4$ ; #2 $-x+1, -y+1, -z$ ; #3 $y-1/4, -x+3/4, z-1/4$ ; #4 $-x+1/2, -y+1, z-1/2$ . |            |               |            |               |            |

**Table S3.** Selected bond lengths (Å) and angles (°) for **1-Tb**.

|                                                                                                                                                                     |            |               |            |               |            |
|---------------------------------------------------------------------------------------------------------------------------------------------------------------------|------------|---------------|------------|---------------|------------|
| Tb1-O1                                                                                                                                                              | 2.396(4)   | Tb1-O5#2      | 2.326(4)   | Tb1-O6#1      | 2.295(4)   |
| Tb1-O2                                                                                                                                                              | 2.505(4)   | Tb1-O3#3      | 2.443(4)   | Tb1-O7        | 2.391(5)   |
| Tb1-O3#4                                                                                                                                                            | 2.625(4)   | Tb1-N1#3      | 2.575(5)   | Tb1-O4#4      | 2.523(5)   |
| O6#1-Tb1-O1                                                                                                                                                         | 94.39(17)  | O6#1-Tb1-O7   | 78.16(17)  | O6#1-Tb1-O3#3 | 72.42(15)  |
| O6#1-Tb1-O5#2                                                                                                                                                       | 144.96(16) | O5#2-Tb1-O7   | 79.56(17)  | O5#2-Tb1-O3#3 | 138.27(15) |
| O5#2-Tb1-O1                                                                                                                                                         | 82.23(15)  | O1-Tb1-O7     | 134.20(16) | O1-Tb1-O3#3   | 75.26(14)  |
| O7-Tb1-O3#3                                                                                                                                                         | 140.08(17) | O7-Tb1-O2     | 82.14(16)  | O1-Tb1-O4#4   | 142.82(16) |
| O6#1-Tb1-O2                                                                                                                                                         | 72.90(16)  | O3#3-Tb1-O2   | 113.21(14) | O7-Tb1-O4#4   | 80.24(18)  |
| O5#2-Tb1-O2                                                                                                                                                         | 77.55(15)  | O6#1-Tb1-O4#4 | 77.62(17)  | O3#3-Tb1-O4#4 | 67.68(15)  |
| O1-Tb1-O2                                                                                                                                                           | 52.92(15)  | O5#2-Tb1-O4#4 | 124.42(15) | O2-Tb1-O4#4   | 148.14(17) |
| O6#1-Tb1-N1#3                                                                                                                                                       | 135.96(16) | O3#3-Tb1-N1#3 | 63.74(15)  | O5#2-Tb1-O3#4 | 73.89(14)  |
| O5#2-Tb1-N1#3                                                                                                                                                       | 77.83(16)  | O2-Tb1-N1#3   | 127.98(16) | O1-Tb1-O3#4   | 142.52(15) |
| O1-Tb1-N1#3                                                                                                                                                         | 78.84(15)  | O4#4-Tb1-N1#3 | 82.23(18)  | O7-Tb1-O3#4   | 69.40(14)  |
| O7-Tb1-N1#3                                                                                                                                                         | 136.02(16) | O6#1-Tb1-O3#4 | 121.64(15) | O3#3-Tb1-O3#4 | 104.20(12) |
| O2-Tb1-O3#4                                                                                                                                                         | 142.58(14) | O4#4-Tb1-O3#4 | 50.54(14)  | N1#3-Tb1-O3#4 | 68.28(15)  |
| Symmetry transformations used to generate equivalent atoms: #1 $y-1/4, -x+1/4, -z+1/4$ ; #2 $-x, -y+1, -z$ ; #3 $y-1/4, -x+3/4, z-1/4$ ; #4 $-x+1/2, -y+1, z-1/2$ . |            |               |            |               |            |

**Table S4.** Results of Continuous Shape Measure Analysis by applying SHAPE 2.1<sup>4</sup> for EuNO8 unit in **1-Eu**.<sup>a</sup>

| Geometry | 1-Eu   |
|----------|--------|
| EP-9     | 33.726 |
| OPY-9    | 21.949 |
| HBPY-9   | 17.723 |
| JTC-9    | 15.308 |
| JCCU-9   | 10.866 |
| CCU-9    | 10.122 |
| JCSAPR-9 | 2.534  |
| CSAPR-9  | 1.747  |
| JTCTPR-9 | 3.166  |
| TCTPR-9  | 2.550  |
| JTDIC-9  | 13.864 |
| HH-9     | 10.688 |
| MFF-9    | 1.356  |

<sup>a</sup>The values are Continuous Shape Measure (CShM) parameters and CShM=0 for the ideal geometry and increases with the increase of the degree of distortion. EP-9 corresponds to Enneagon. OPY-9 corresponds to Octagonal pyramid. HBPY-9 corresponds to Heptagonal bipyramid. JTC-9 corresponds to Johnson triangular cupola J3. JCCU-9 corresponds to Capped cube J8. CCU-9 corresponds to Spherical-relaxed capped cube. JCSAPR-9 corresponds to Capped square antiprism J10. CSAPR-9 corresponds to Spherical capped square antiprism. JTCTPR-9 corresponds to Tricapped trigonal prism J51. TCTPR-9 corresponds to Spherical Tricapped trigonal prism. JTDIC-9 corresponds to Tridiminished icosahedron J63. HH-9 corresponds to Hula-hoop. MFF-9 corresponds to Muffin.

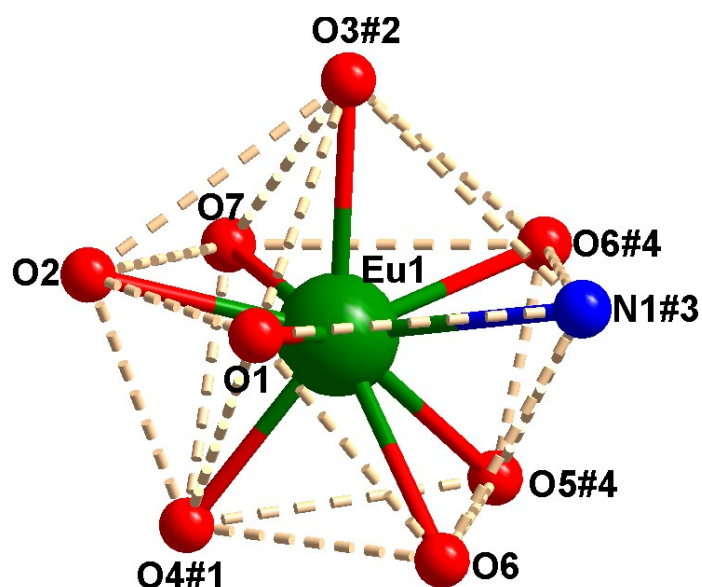

**Fig. S1** Coordination geometry of the  $\text{Eu}^{3+}$  ion in **1-Eu**. Symmetry codes: #1  $y-1/4, -x+5/4, -z+1/4$ ; #2  $-x+1, -y+1, -z$ ; #3  $y-1/4, -x+3/4, z-1/4$ ; #4  $-x+1/2, -y+1, z-1/2$ .

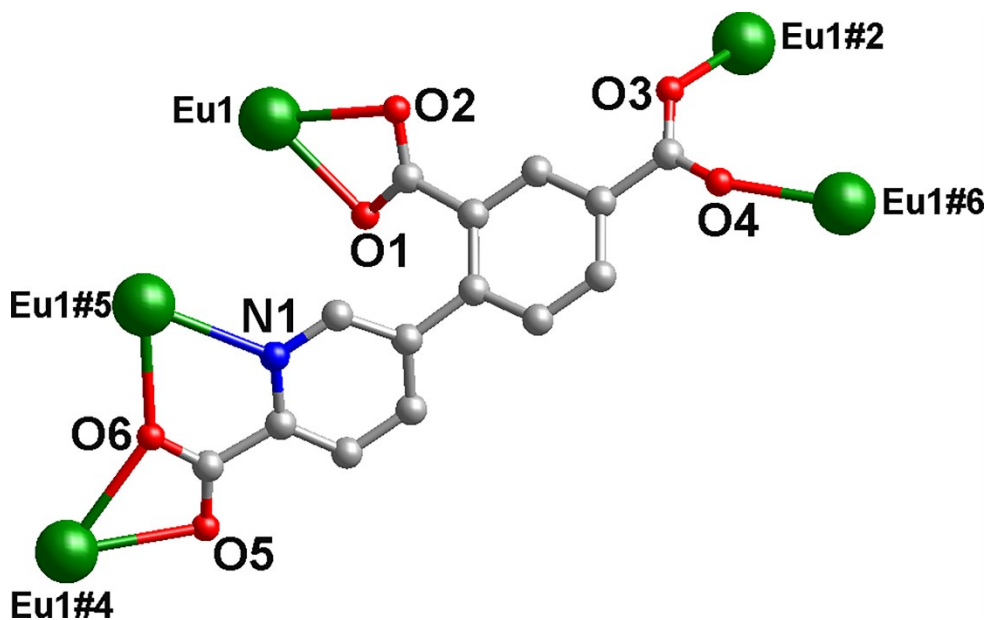

**Fig. S2** Coordination mode of the ligand in **1-Eu**. Symmetry codes: #2  $-x+1, -y+1, -z$ ; #4  $-x+1/2, -y+1, z-1/2$ ; #5  $-y+3/4, x+1/4, z+1/4$ ; #6  $-y+5/4, x+1/4, -z+1/4$ .

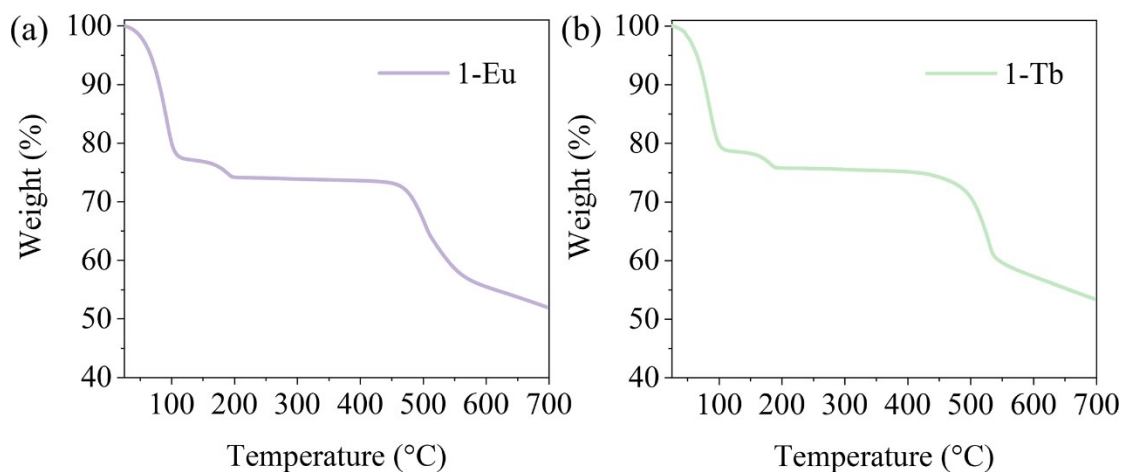

**Fig. S3** Thermogravimetric analysis of **1-Eu** (a) and **1-Tb** (b).

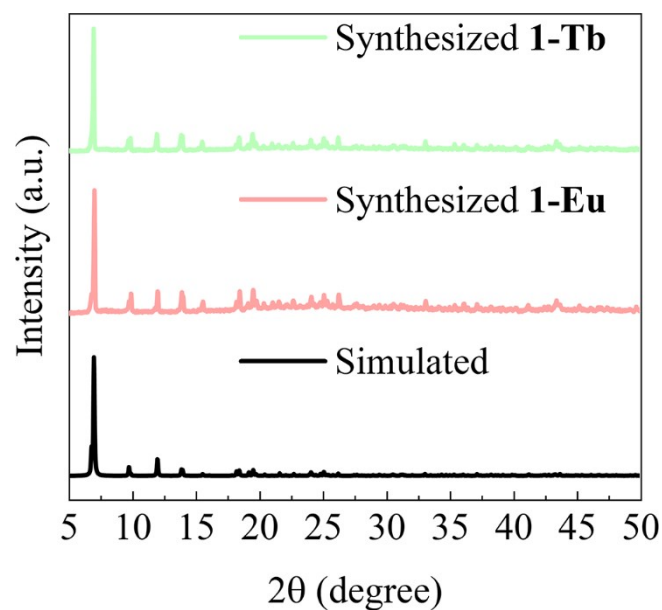

**Fig. S4** PXRD patterns of **1-Eu** and **1-Tb**.

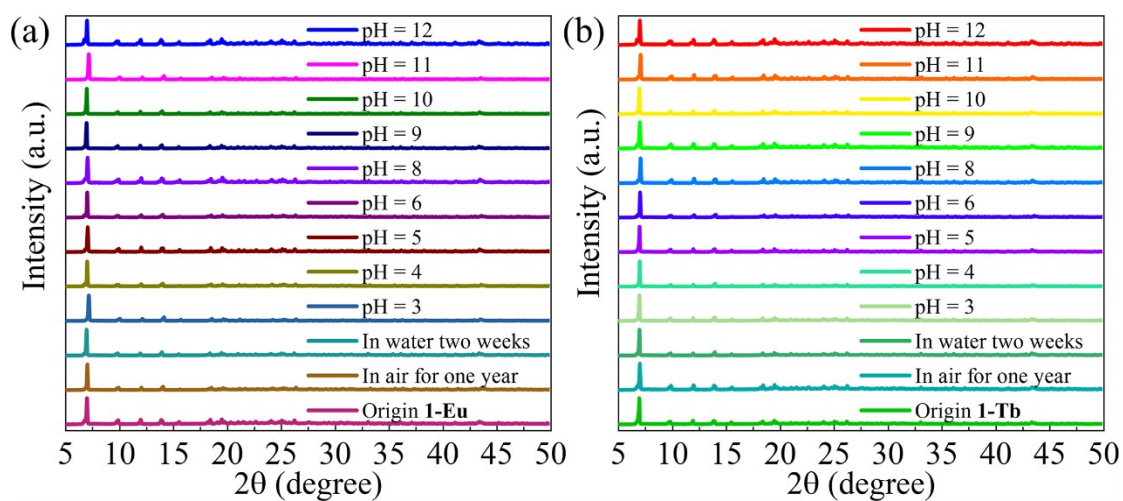

**Fig. S5** PXRD patterns of **1-Eu** and **1-Tb** after treatment with different conditions.

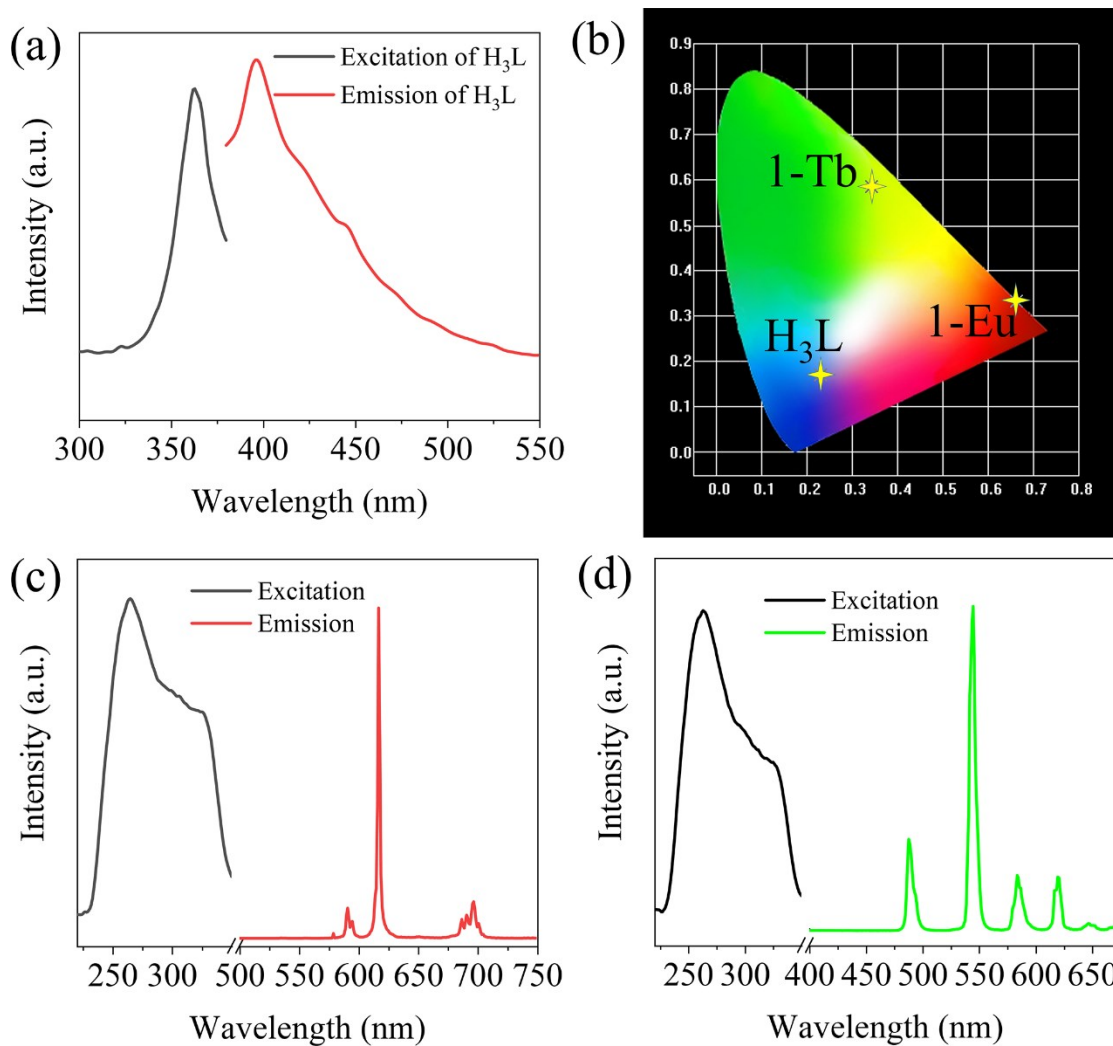

**Fig. S6** (a) Excitation and emission spectra of H<sub>3</sub>L. (b) CIE chromaticity diagram of H<sub>3</sub>L, **1-Eu** and **1-Tb**. (c) Excitation and emission spectra of **1-Eu** and **1-Tb** (d).

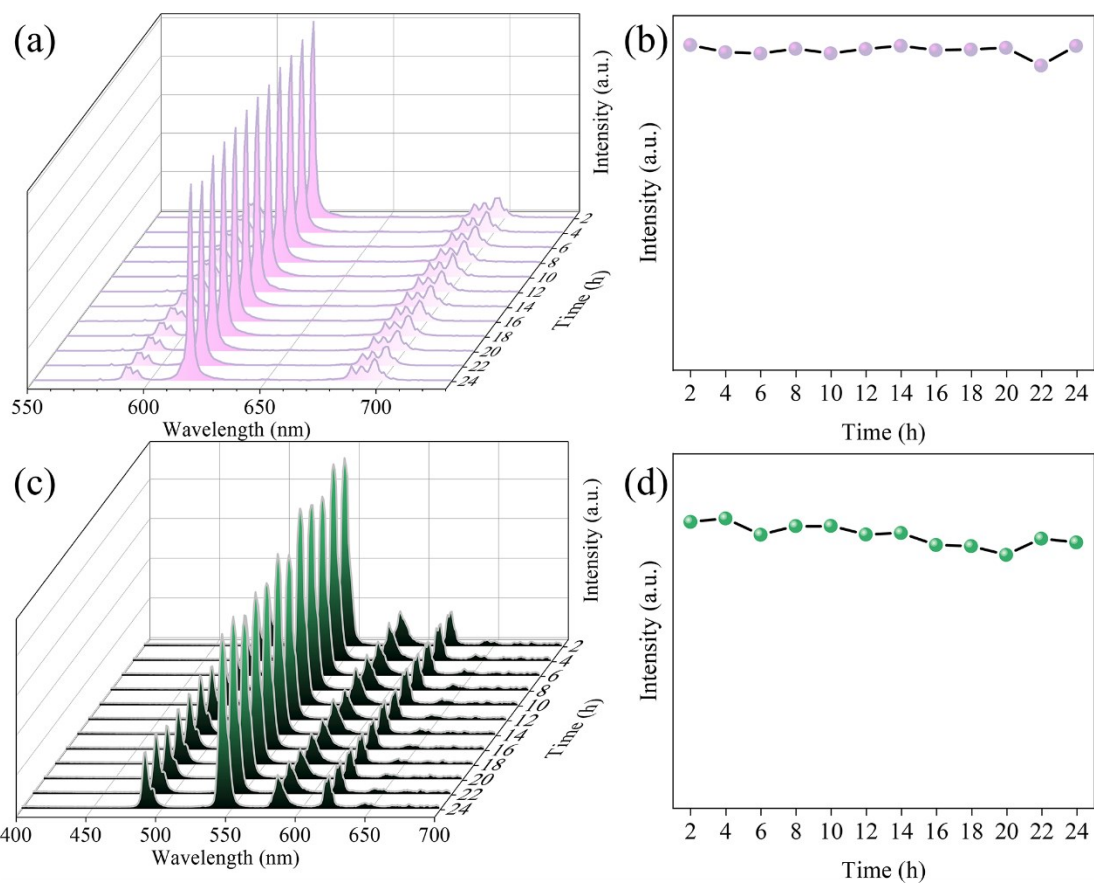

**Fig. S7** (a, b) The emission spectra and emission intensities at 617 nm of **1-Eu** after immersion in water for different times. (c, d) The emission spectra and emission intensities at 545 nm of **1-Tb** after immersion in water for different times.



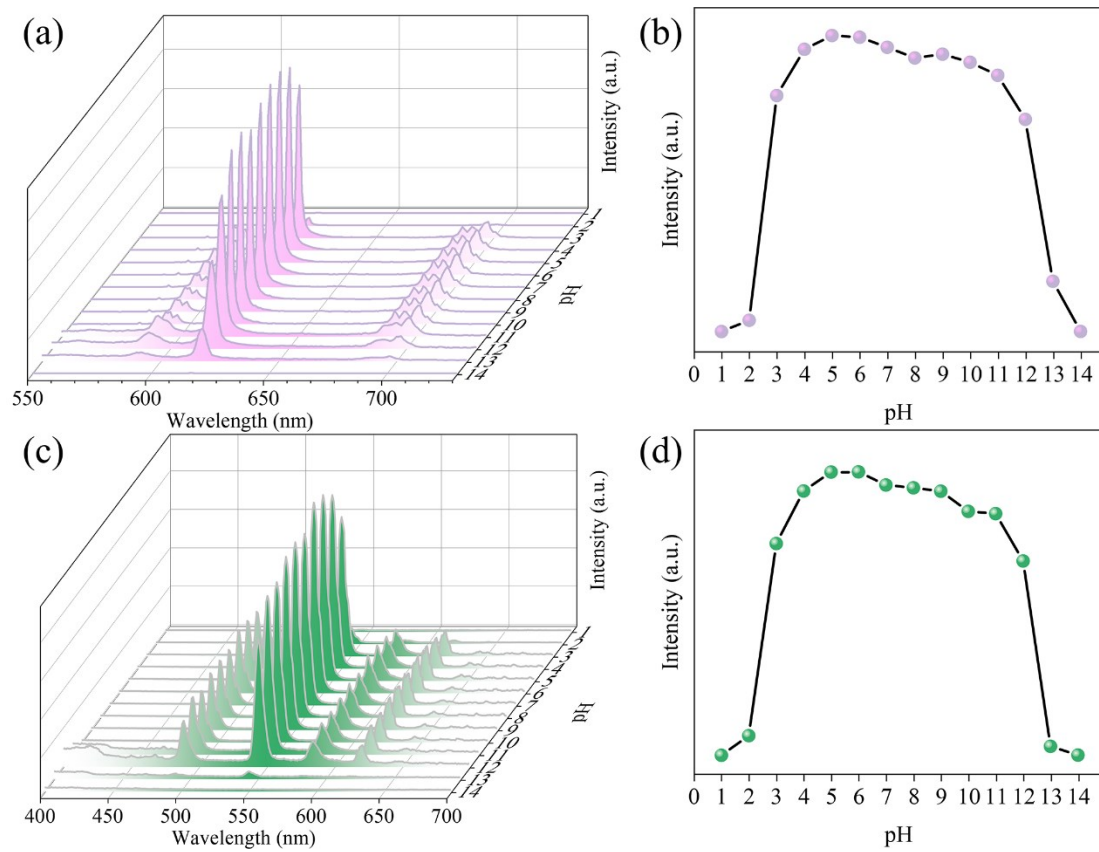

**Fig. S8** (a, b) The emission spectra and emission intensities at 617 nm of **1-Eu** in aqueous solutions with different pH values (1-14). (c, d) The emission spectra and emission intensities at 545 nm of **1-Tb** in aqueous solutions with different pH values (1-14).

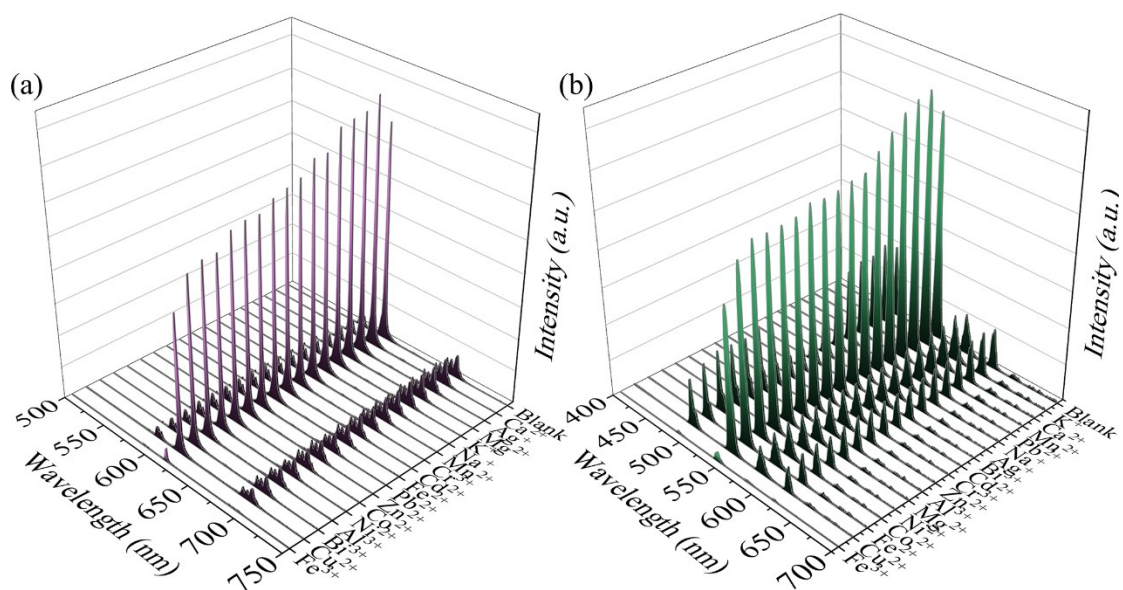

Fig. S9 Emission spectra of 1-Eu (a) and 1-Tb (b) immersed in cation aqueous solutions.

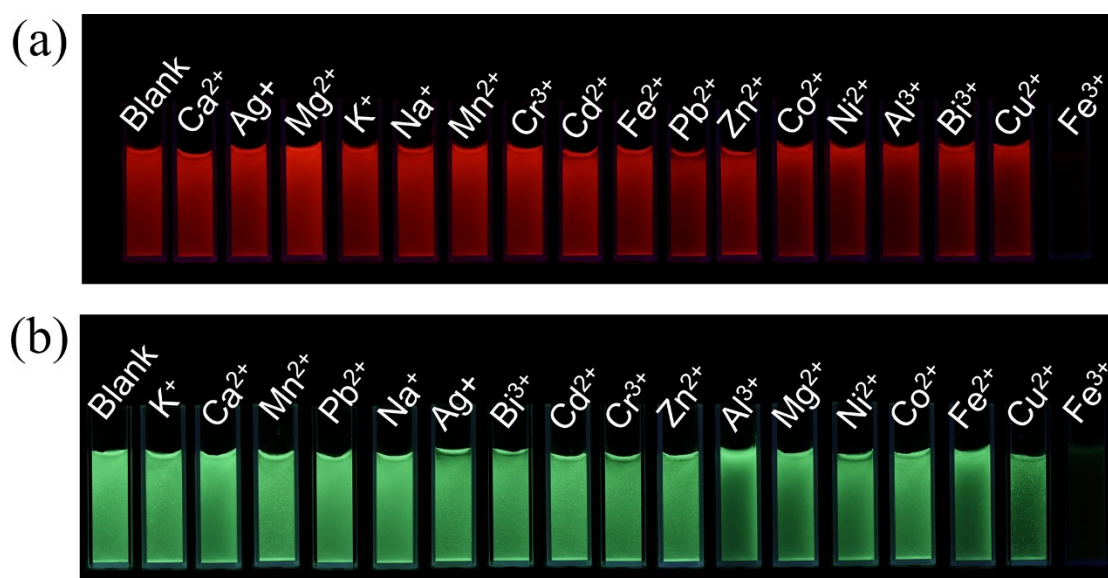

Fig. S10 The photographs of the aqueous dispersed 1-Eu (a) and 1-Tb (b) in the presence of different cations under UV irradiation.

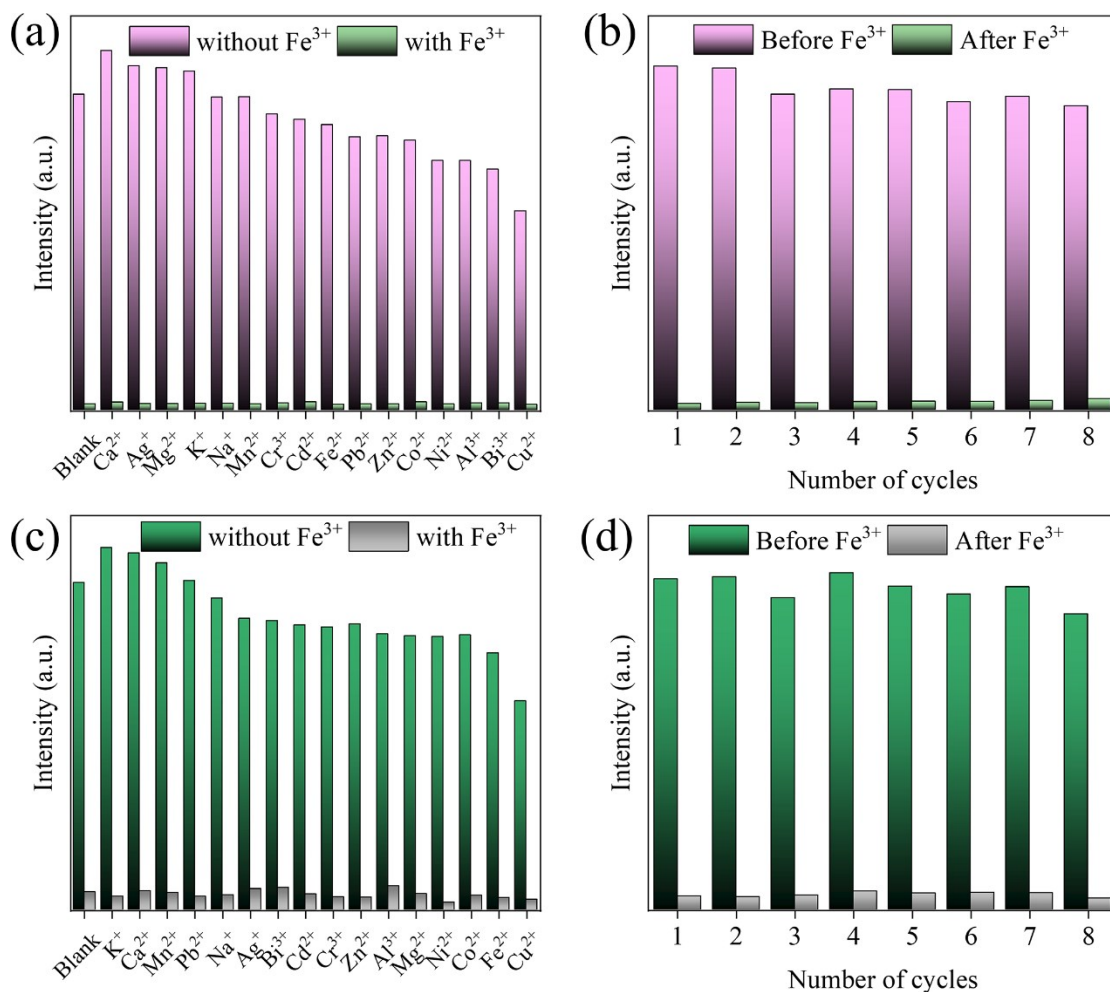

**Fig. S11** (a) Luminescent responses of **1-Eu** with mixed-cations (1 mM) in aqueous solutions. (b) Eight cycles test by measuring the luminescent intensity at 617 nm of **1-Eu** before and after the adding of Fe<sup>3+</sup> (1 mM). (c) Luminescent responses of **1-Tb** with mixed-cations (1 mM) in aqueous solutions. (d) Eight cycles test by measuring the luminescent intensity at 545 nm of **1-Tb** before and after the adding of Fe<sup>3+</sup> (1 mM).

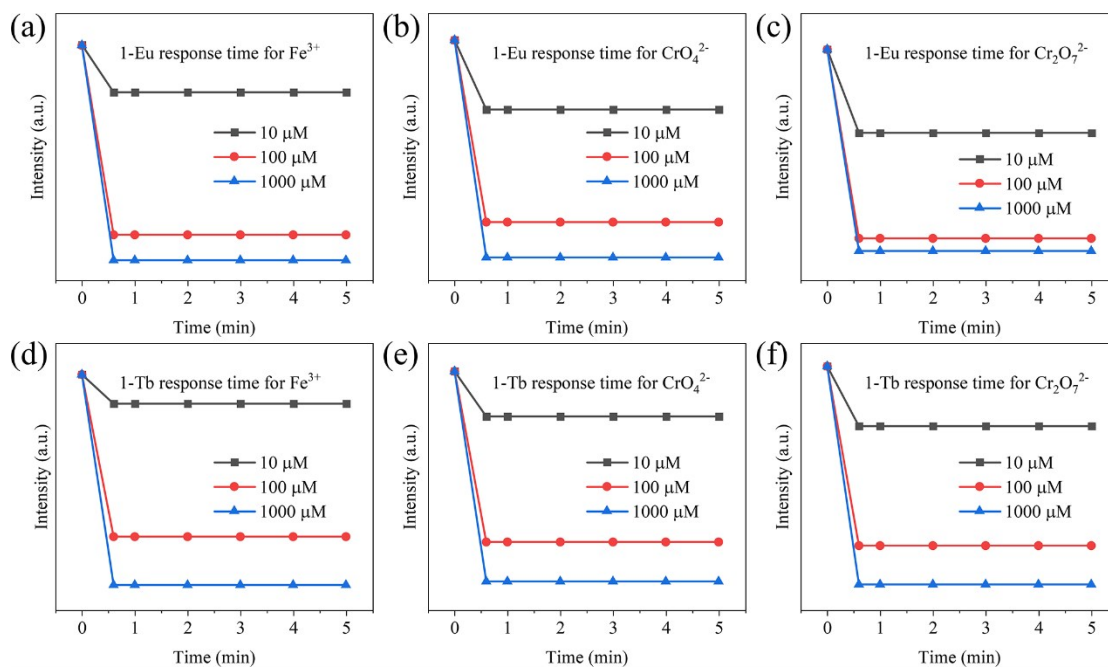

**Fig. S12** Effects of response time on the fluorescent intensities at 617 nm of the aqueous suspension of **1-Eu** (a, b and c) and **1-Tb** (d, e and f) in the presence of Fe<sup>3+</sup>, CrO<sub>4</sub><sup>2-</sup> and Cr<sub>2</sub>O<sub>7</sub><sup>2-</sup> at different concentrations.

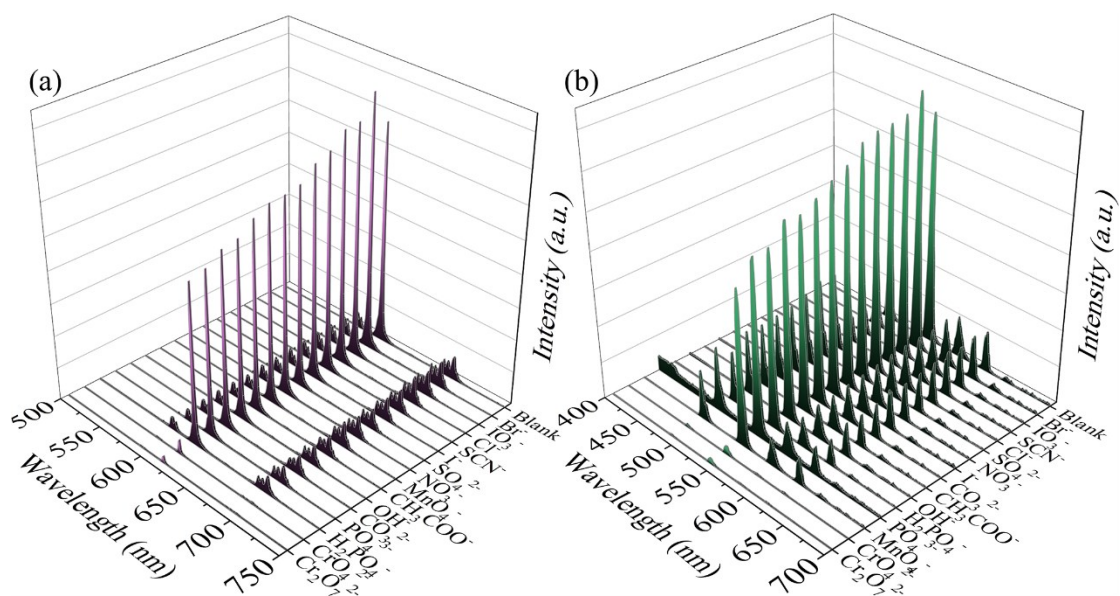

**Fig. S13** Emission spectra of **1-Eu** (a) and **1-Tb** (b) immersed in anion aqueous solutions.

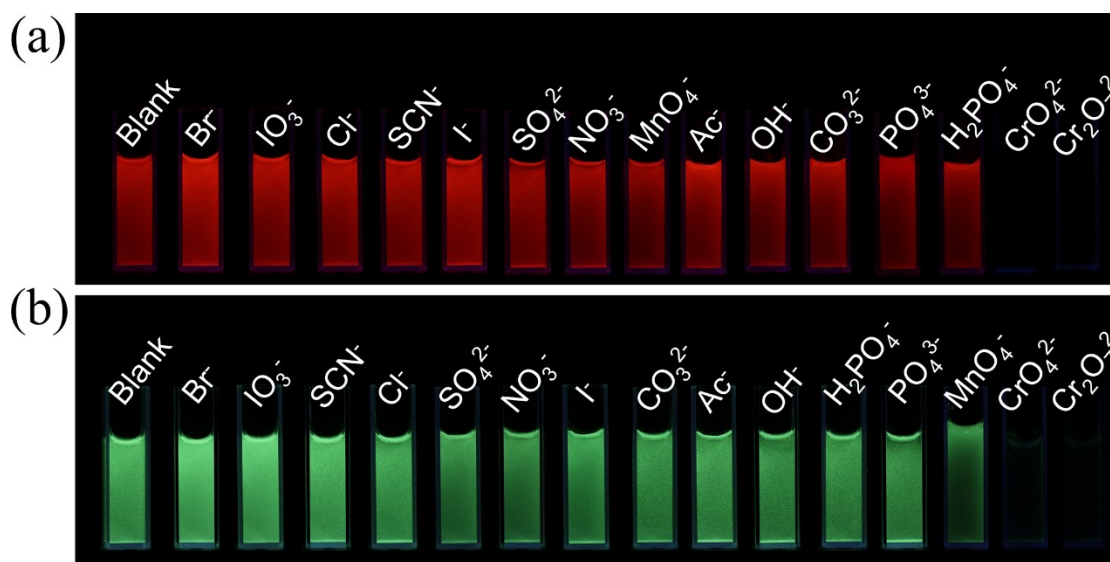

**Fig. S14** The photographs of the aqueous dispersed **1-Eu** (a) and **1-Tb** (b) in the presence of different anions under UV irradiation.

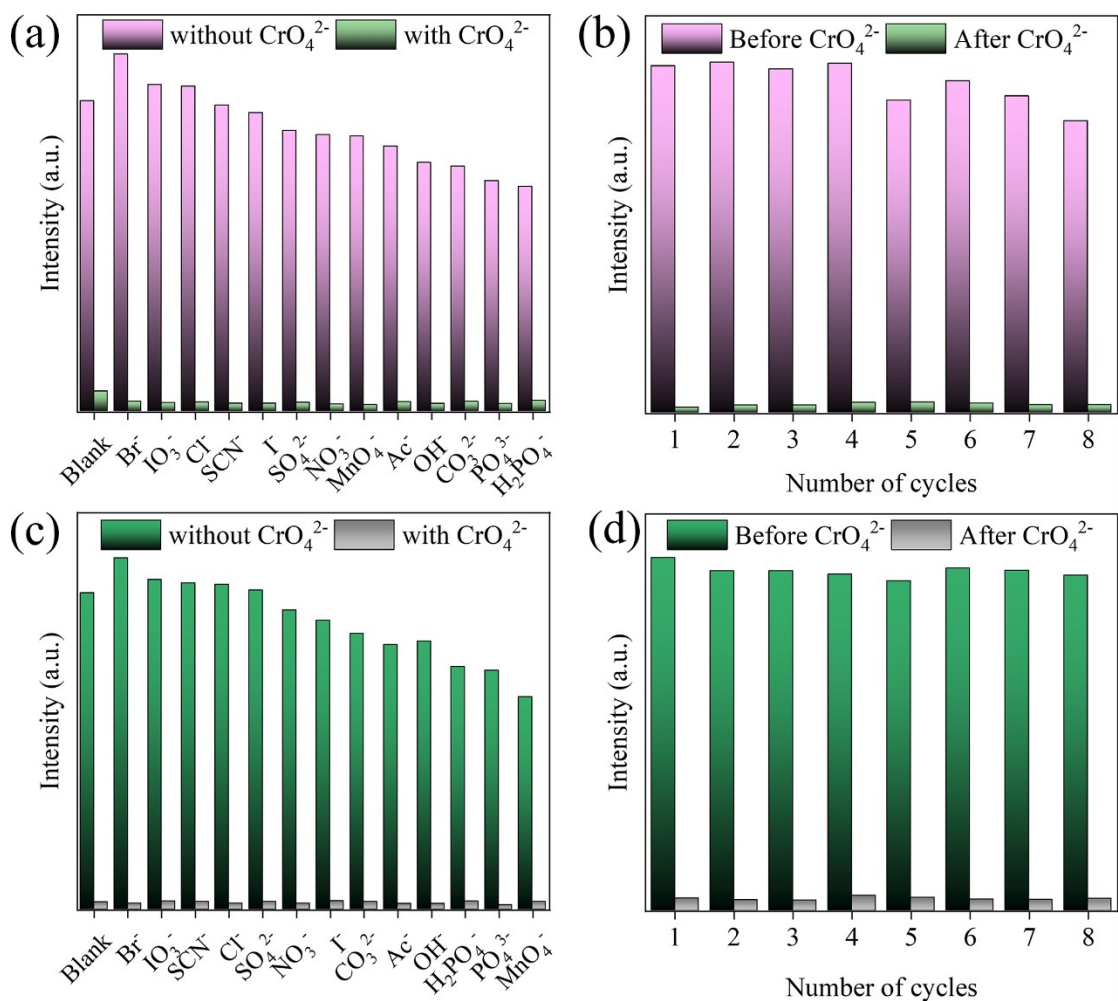

**Fig. S15** (a) Luminescent responses of **1-Eu** with mixed-anions (1 mM) in aqueous solutions. (b) Eight cycles test by measuring the luminescent intensity at 617 nm of **1-Eu** before and after the adding of CrO<sub>4</sub><sup>2-</sup> (1 mM). (c) Luminescent responses of **1-Tb** with mixed-cations (1 mM) in aqueous solutions. (d) Eight cycles test by measuring the luminescent intensity at 545 nm of **1-Tb** before and after the adding of CrO<sub>4</sub><sup>2-</sup> (1 mM).

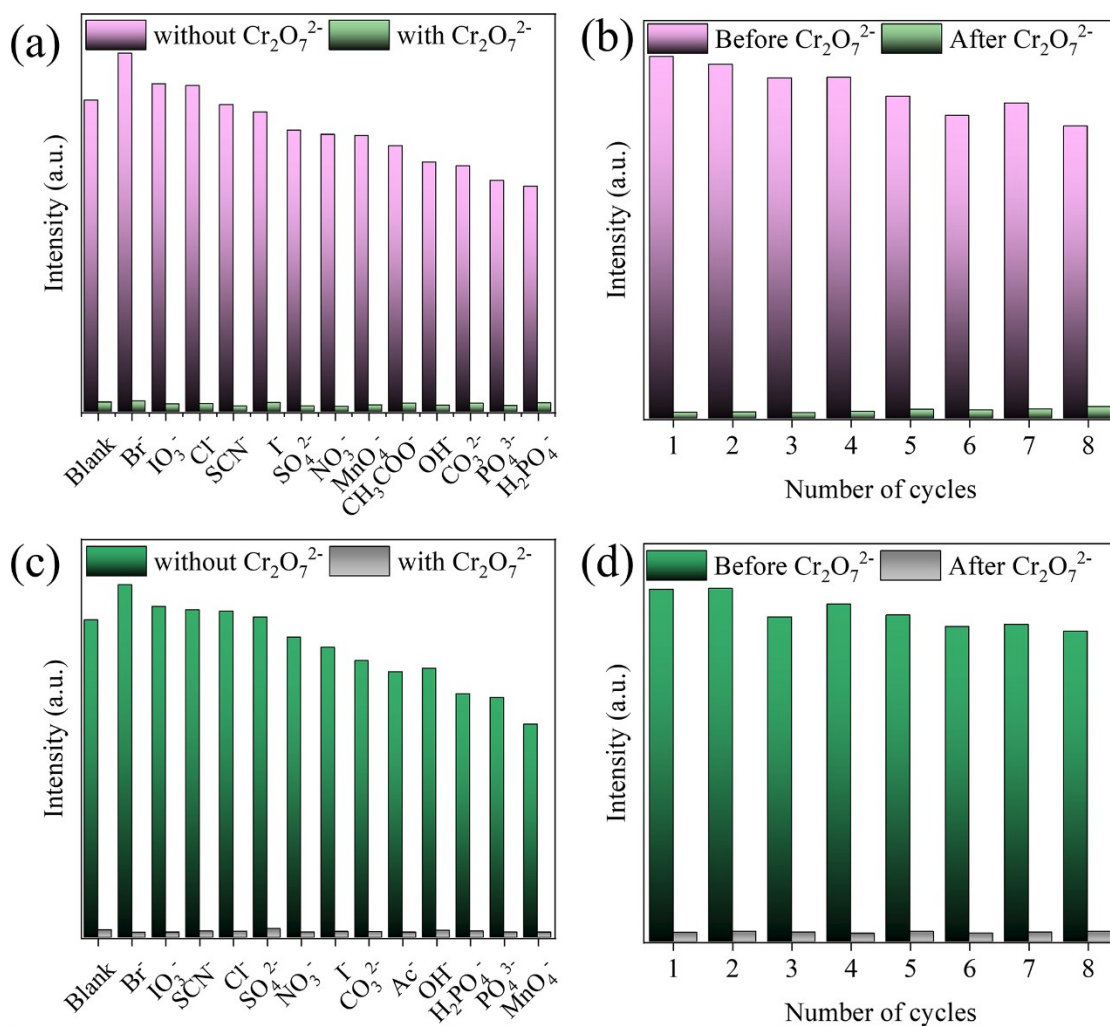

**Fig. S16** (a) Luminescent responses of **1-Eu** with mixed-anions (1 mM) in aqueous solutions. (b) Eight cycles test by measuring the luminescent intensity at 617 nm of **1-Eu** before and after the adding of  $\text{Cr}_2\text{O}_7^{2-}$  (1 mM). (c) Luminescent responses of **1-Tb** with mixed-cations (1 mM) in aqueous solutions. (d) Eight cycles test by measuring the luminescent intensity at 545 nm of **1-Tb** before and after the adding of  $\text{Cr}_2\text{O}_7^{2-}$  (1 mM).

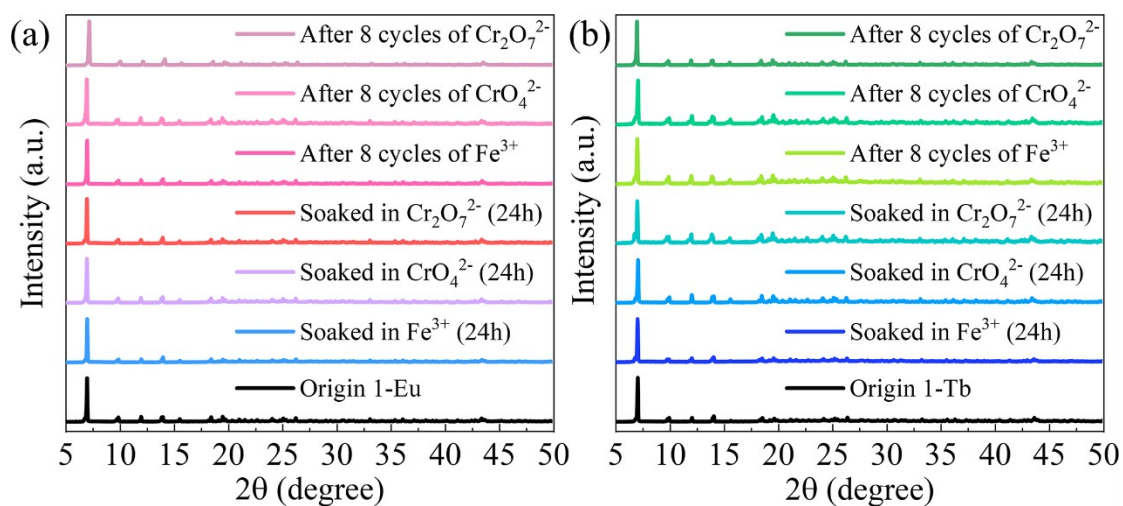

**Fig. S17** The PXRD patterns of **1-Eu** (a) and **1-Tb** (b) after using eight cycles and soaked in aqueous  $\text{Fe}^{3+}$  and  $\text{CrO}_4^{2-}/\text{Cr}_2\text{O}_7^{2-}$  solution (1 mM) for 24 h.

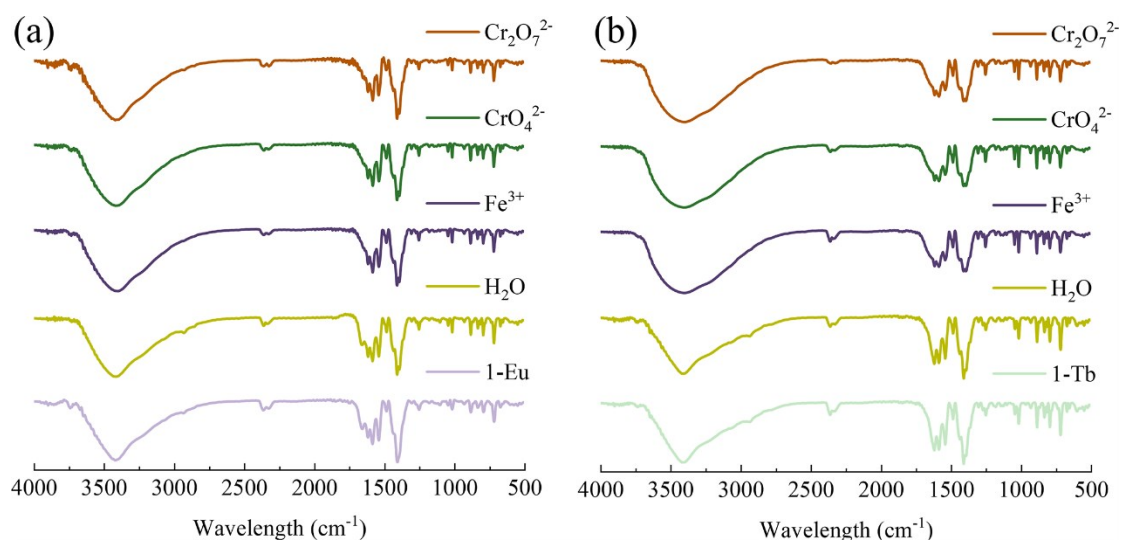

**Fig. S18** IR spectra of **1-Eu** (a), **1-Tb** (b) in different solution.

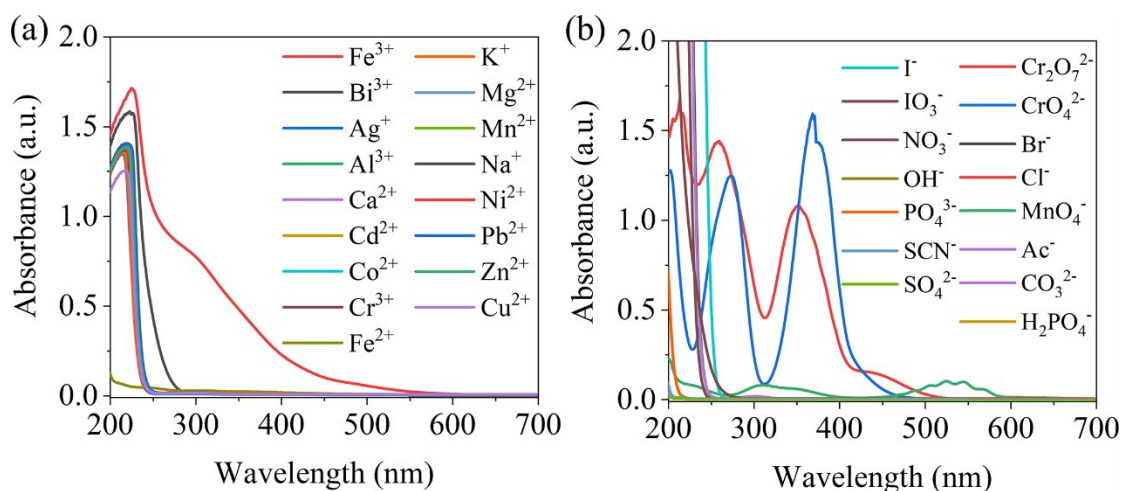

**Fig. S19** The UV-Vis absorption spectrum of aqueous solutions of different testing cations (a), anions (b).



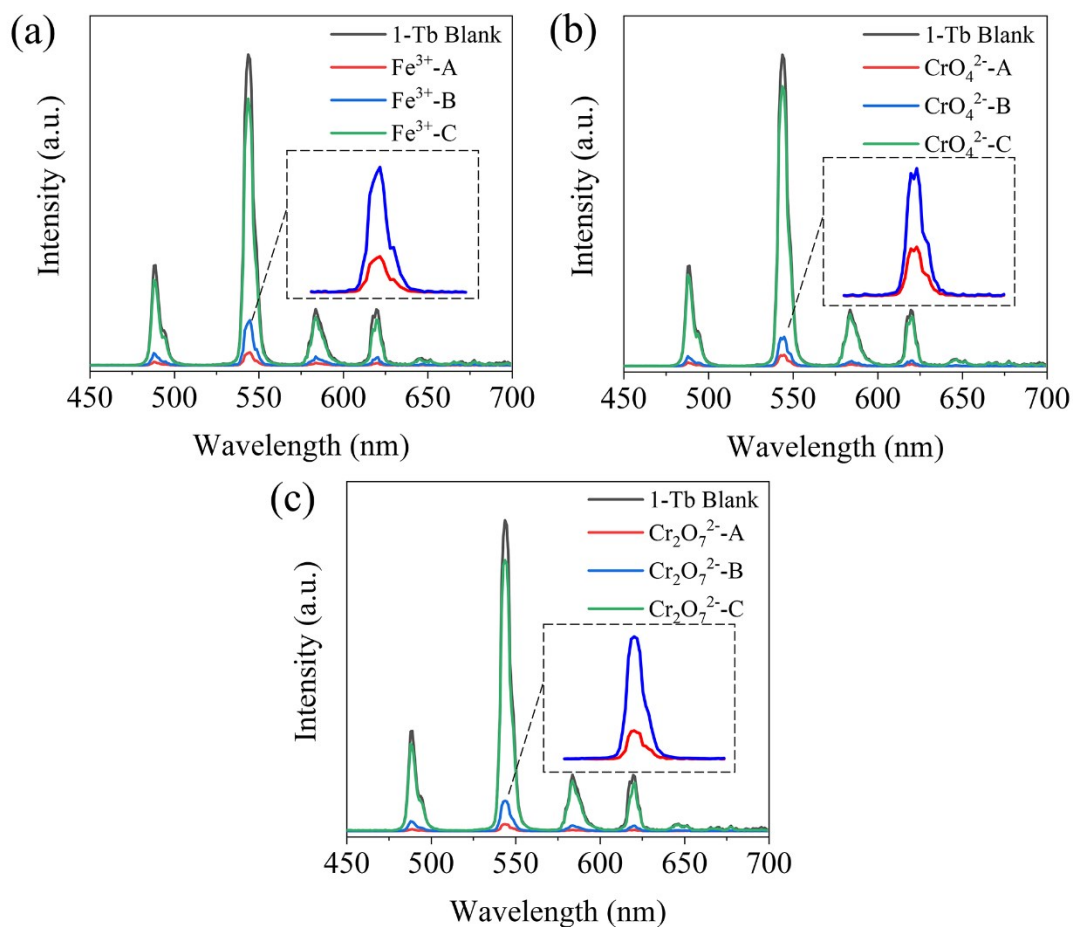

**Fig. S20** The emission spectra of **1-Tb** with (a) Fe<sup>3+</sup>, (b) CrO<sub>4</sub><sup>2-</sup>, and (c) Cr<sub>2</sub>O<sub>7</sub><sup>2-</sup>. (Black curves, **1-Tb** solely in position A; red curves, mixture of **1-Tb** and Fe<sup>3+</sup> and CrO<sub>4</sub><sup>2-</sup>/Cr<sub>2</sub>O<sub>7</sub><sup>2-</sup> ions in position A; blue curves, **1-Tb** in position A while Fe<sup>3+</sup> and CrO<sub>4</sub><sup>2-</sup>/Cr<sub>2</sub>O<sub>7</sub><sup>2-</sup> ions in position B; green curves, **1-Tb** in position A while Fe<sup>3+</sup> and CrO<sub>4</sub><sup>2-</sup>/Cr<sub>2</sub>O<sub>7</sub><sup>2-</sup> ions in position C.)

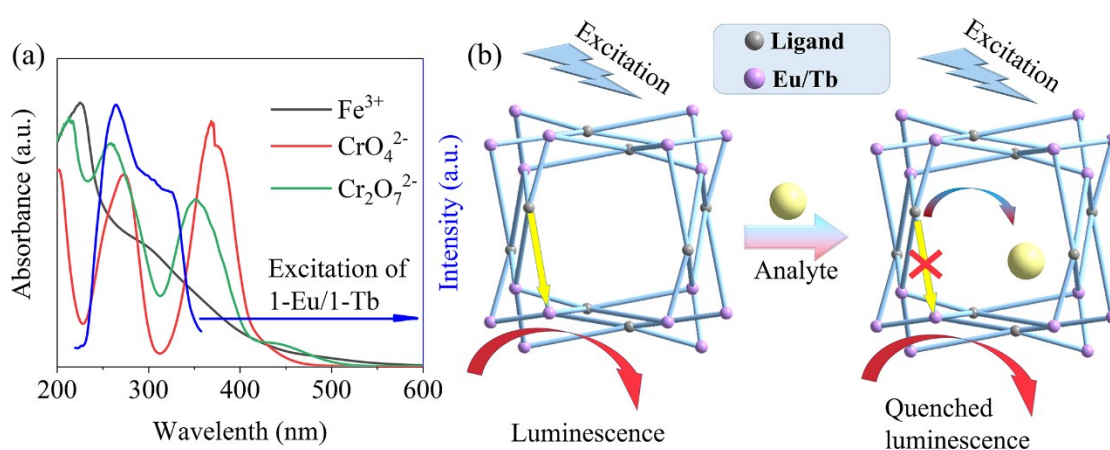

**Fig. S21** (a) The overlap between the UV-vis spectra of Fe<sup>3+</sup>/CrO<sub>4</sub><sup>2-</sup>/Cr<sub>2</sub>O<sub>7</sub><sup>2-</sup> in aqueous solutions and the excitation spectrum of **1-Eu/1-Tb**. (b) The schematic illustration of the mechanism of **1-Eu/1-Tb** sensing for the analytes.

**Table S5.** A comparison of quenching constants and corresponding LODs for various luminescent MOFs used for detection of Fe<sup>3+</sup>.

| Materials                                                                                                                                              | solvent | $K_{sv}(M^{-1})$    | Detection limit ( $\mu M$ ) | Reference                                                          |
|--------------------------------------------------------------------------------------------------------------------------------------------------------|---------|---------------------|-----------------------------|--------------------------------------------------------------------|
| <b>1-Eu</b>                                                                                                                                            | water   | $2.78 \times 10^4$  | 0.67                        | <b>This work</b>                                                   |
| <b>1-Tb</b>                                                                                                                                            | water   | $1.48 \times 10^4$  | 1.26                        | <b>This work</b>                                                   |
| [Cd(NDA)(L)(H <sub>2</sub> O) <sub>2</sub> ] <sub>n</sub>                                                                                              | water   | $4.0 \times 10^4$   | 2.06                        | <i>J. Mater. Chem. C</i> , 2020, <b>8</b> , 1427-1432.             |
| [Ln(L <sub>2</sub> )(H <sub>2</sub> O)(DMF)] <sub>n</sub>                                                                                              | water   | $3.10 \times 10^4$  | 1.57                        | <i>ACS Appl. Mater. Interfaces</i> , 2019, <b>11</b> , 7914-7926.  |
| DPYBT                                                                                                                                                  | water   | —                   | 3.04                        | <i>Sens. Actuators, B</i> , 2020, <b>320</b> , 128377-128386.      |
| IISERP-MOF25                                                                                                                                           | water   | $1.52 \times 10^4$  | 12.3                        | <i>ACS Appl. Nano Mater</i> , 2019, <b>2</b> , 5169-5178.          |
| Eu-MOF                                                                                                                                                 | water   | $2.028 \times 10^4$ | —                           | <i>Inorg. Chem.</i> , 2020, <b>59</b> , 2005-2010.                 |
| Tb-MOF                                                                                                                                                 | water   | $1.204 \times 10^4$ | —                           | <i>Inorg. Chem.</i> , 2020, <b>59</b> , 2005-2010.                 |
| 534-MOF-Tb(L <sub>11</sub> )                                                                                                                           | water   | $5.51 \times 10^3$  | 130                         | <i>J. Mater. Chem. C</i> , 2017, <b>5</b> , 2015-2021.             |
| Zn-MOF                                                                                                                                                 | water   | $1.326 \times 10^4$ | 0.882                       | <i>Inorg. Chem.</i> , 2020, <b>59</b> , 8818-8826.                 |
| [Eu(O-cpia)(phen)]                                                                                                                                     | water   | —                   | 300 ppm                     | <i>Sens. Actuators, B</i> , 2018, <b>258</b> , 358-364.            |
| BUT-15                                                                                                                                                 | water   | $1.66 \times 10^4$  | 0.3                         | <i>ACS Appl. Mater. Interfaces</i> , 2017, <b>9</b> , 10286-10295. |
| [Zn <sub>2</sub> (TPOM)(NDC <sub>2</sub> ) <sub>2</sub> ].3.5H <sub>2</sub> O                                                                          | water   | $1.9 \times 10^4$   | 2                           | <i>J. Mater. Chem. A</i> , 2016, <b>4</b> , 15494-15500.           |
| [Eu(L)(H <sub>2</sub> O)].1.5H <sub>2</sub> O                                                                                                          | water   | $6.6 \times 10^4$   | 0.87                        | <i>New. J. Chem.</i> , 2018, <b>42</b> , 19485-19493.              |
| FJI-C8 (Zn)                                                                                                                                            | water   | $8.2 \times 10^3$   | 23.3                        | <i>Dalton Trans.</i> , 2018, <b>47</b> , 3452-3458.                |
| {[Cd <sub>2</sub> (bptc)(phen) <sub>2</sub> ].4H <sub>2</sub> O} <sub>n</sub>                                                                          | water   | $3.07 \times 10^3$  | 21.7                        | <i>Inorg. Chem.</i> , 2017, <b>56</b> , 11768-11778.               |
| Eu <sub>2</sub> (MFDA) <sub>2</sub> (HCOO) <sub>2</sub> (H <sub>2</sub> O) <sub>6</sub>                                                                | DMF     | $1.58 \times 10^3$  | 0.3                         | <i>Dalton Trans.</i> 2013, <b>42</b> , 12403-12409.                |
| MOF-808-Tb                                                                                                                                             | water   | $3.12 \times 10^4$  | —                           | <i>Chem. Commun.</i> , 2019, <b>55</b> , 4727-4730.                |
| [Zr <sub>6</sub> O <sub>4</sub> (OH) <sub>4</sub> (C <sub>8</sub> H <sub>2</sub> O <sub>4</sub> S <sub>2</sub> ) <sub>6</sub> ].DMF.18H <sub>2</sub> O | water   | $4.41 \times 10^3$  | 1.26                        | <i>Dalton Trans.</i> , 2018, <b>47</b> , 1159-1170.                |
| [Cd <sub>2</sub> Na(L <sub>15</sub> )(BDC) <sub>2.5</sub> ].9H <sub>2</sub> O                                                                          | DMF     | $1.67 \times 10^4$  | 162ppb                      | <i>J. Mater. Chem. A</i> , 2017, <b>5</b> , 15797-15807.           |

|                            |       |                    |   |                                                          |
|----------------------------|-------|--------------------|---|----------------------------------------------------------|
| $\{[Cd(5-asba)(bimb)]\}_n$ | water | $1.78 \times 10^4$ | — | <i>J. Mater. Chem. C</i> , 2016, <b>4</b> , 11404-11418. |
|----------------------------|-------|--------------------|---|----------------------------------------------------------|

**Table S6.** A comparison of quenching constants and corresponding LODs for various luminescent MOFs used for detection of  $CrO_4^{2-}/Cr_2O_7^{2-}$ .

| Materials                                           | Analytes                  | solvent | Detection limit ( $\mu$ M) | Reference                                                           |
|-----------------------------------------------------|---------------------------|---------|----------------------------|---------------------------------------------------------------------|
| <b>1-Eu</b>                                         | $CrO_4^{2-}/Cr_2O_7^{2-}$ | water   | 0.53/0.32                  | <b>This work</b>                                                    |
| <b>1-Tb</b>                                         | $CrO_4^{2-}/Cr_2O_7^{2-}$ | water   | 0.75/0.57                  | <b>This work</b>                                                    |
| USTC-5                                              | $CrO_4^{2-}/Cr_2O_7^{2-}$ | water   | 11.4/1.45                  | <i>J. Mater. Chem. C</i> , 2020, <b>8</b> , 11786-11795             |
| $\{[Zn_2L_2(H_2O)_4] \cdot H_2O\}_n$                | $CrO_4^{2-}/Cr_2O_7^{2-}$ | water   | 2.3 / 2.6                  | <i>Dalton Trans.</i> , 2019, <b>48</b> , 387-394.                   |
| $[(CH_3)_2NH_2][In(TNB)_{4/3}] \cdot (2DMF)(3H_2O)$ | $CrO_7^{2-}$              | water   | 45                         | <i>J. Mater. Chem. C.</i> , 2018, <b>6</b> , 6440–6448.             |
| $[Zn(NH_2-bdc)(4,4'-bpy)]$                          | $CrO_4^{2-}/Cr_2O_7^{2-}$ | water   | 2.21/1.3                   | <i>Sens. Actuators, B</i> , 2019, <b>284</b> , 403-413.             |
| Zn-MOF                                              | $CrO_4^{2-}/Cr_2O_7^{2-}$ | water   | 1.07/1.04                  | <i>Inorg. Chem.</i> , 2020, <b>59</b> , 8818-8826.                  |
| Zn-MOF-1                                            | $CrO_4^{2-}/Cr_2O_7^{2-}$ | water   | 4.8/3.53                   | <i>J. Mater. Chem. A</i> , 2017, <b>5</b> , 20035-20043.            |
| $[Zn_2(L_1)(L_2)_2] \cdot 4H_2O$                    | $CrO_4^{2-}/Cr_2O_7^{2-}$ | DMF     | 4.8/3.9                    | <i>J. Mater. Chem. A</i> , 2016, <b>4</b> , 15494-15500.            |
| $\{[Zn_3(mtrb)_3(btc)_2] \cdot 3H_2O\}_n$           | $CrO_4^{2-}/Cr_2O_7^{2-}$ | water   | 4.52/2.83                  | <i>Dalton Trans.</i> , 2018, <b>47</b> , 6189–6198.                 |
| $[Zn(tpbpc)_2] \cdot \text{solvent}$                | $CrO_4^{2-}/Cr_2O_7^{2-}$ | water   | 0.47 / 0.68                | <i>Sens. Actuators, B</i> , 2018, <b>269</b> , 164-172.             |
| $Zr_6O_4(OH)_7(H_2O)_3(btba)_3$                     | $CrO_7^{2-}$              | water   | 1.57                       | <i>ACS Appl. Mater. Interfaces</i> , 2018, <b>10</b> , 16650-16659. |
| $[Zn_3(bpanth)(oba)_3] \cdot 2DMF$                  | $CrO_4^{2-}/Cr_2O_7^{2-}$ | water   | 2.67/1.85                  | <i>Chem.-Eur. J.</i> , 2018, <b>24</b> , 3192-3198.                 |
| $[Eu_7(mtb)_5(H_2O)_{16}](NO_3)(DMA)_8(H_2O)_{18}$  | $CrO_4^{2-}$              | water   | 3.5 nM                     | <i>ACS Appl. Mater. Interfaces</i> , 2017, <b>9</b> , 16448-16457.  |
| $[Cd(TIPA)_2(ClO_4)_2](DMF)_3(H_2O)$                | $CrO_7^{2-}$              | water   | 27nM                       | <i>Dalton Trans.</i> , 2018, <b>47</b> , 3725-3732.                 |
| $Eu^{3+}@MIL-124$                                   | $CrO_7^{2-}$              | water   | 0.15                       | <i>ACS Appl. Mater. Interfaces</i> , 2015, <b>7</b> , 721-729.      |
| NU-1000                                             | $CrO_7^{2-}$              | water   | 1.8                        | <i>Inorg. Chem.</i> , 2017, <b>56</b> , 14178-14188.                |

## References

- 1 Y. J. Cui, H. Xu, Y. F. Yue, Z. Y. Guo, J. C. Yu, Z. X. Chen, J. K. Gao, Y. Yang, G. D. Qian and B. L. Chen, *J. Am. Chem. Soc.*, 2012, **134**, 3979–3982.
- 2 G. M. Sheldrick, Program for Empirical Absorption Correction of Area Detector Data, University of Göttingen, Germany, 1996.
- 3 G. M. Sheldrick, SHELXS-97, Program for Crystal Structure Solution, Göttingen University, Göttingen, Germany, 1997.
- 4 S. Alvarez, P. Alemany, D. Casanova, J. Cirera, M. Lluell and D. Avnir, *Coord. Chem. Rev.*, 2005, **249**, 1693–1708.
